# Supplementary material
Source: PubMed Central journal article supplement (PMC7354207)
Supplement: NIHMS1551521-supplement-2.pdf [file NIHMS1551521-supplement-2.pdf]

**Supplemental Table 1: Correlation coefficients of WCBS severity scores and central subfield thickness for right and left eyes among all imaging modalities at any examination\***

| <b>Pearson's <i>r</i></b> | <b>Photo Right</b> | <b>Photo Left</b> | <b>OCT Right</b> | <b>OCT Left</b> | <b>CST Right</b> | <b>CST Left</b> |
|---------------------------|--------------------|-------------------|------------------|-----------------|------------------|-----------------|
| <b>Photo Right</b>        | 1.00               | 0.89              | 0.92             | 0.91            | -0.89            | -0.90           |
|                           | 71                 | 71                | 24               | 23              | 24               | 23              |
| <b>Photo Left</b>         | 0.89               | 1.00              | 0.90             | 0.90            | -0.84            | -0.85           |
|                           | 71                 | 71                | 24               | 23              | 24               | 23              |
| <b>OCT Right</b>          | 0.92               | 0.90              | 1.00             | 0.97            | -0.88            | -0.90           |
|                           | 24                 | 24                | 23               | 23              | 24               | 23              |
| <b>OCT Left</b>           | 0.91               | 0.90              | 0.97             | 1.00            | -0.92            | -0.93           |
|                           | 23                 | 23                | 23               | 23              | 23               | 23              |
| <b>CST Right</b>          | -0.89              | -0.84             | -0.88            | -0.92           | 1.00             | 0.99            |
|                           | 24                 | 24                | 24               | 23              | 24               | 23              |
| <b>CST Left</b>           | -0.90              | -0.85             | -0.90            | -0.93           | 0.99             | 1.0             |
|                           | 23                 | 23                | 23               | 23              | 23               | 23              |

\* all p-values <.0001

CST=Central Subfield Thickness; OCT= Optical Coherence Tomography; Photo=fundus photography
